# Supplementary material
Source: PubMed Central journal article supplement (PMC4287214)
Supplement: NIHMS647565-supplement-Supporting_Information.pdf [file NIHMS647565-supplement-Supporting_Information.pdf]

**Supplementary Table 1.** Selected P450 enzymes used in this study. Sequence identity with respect to the heme domain of P450<sub>BM3</sub> was determined using ClustalW2.1.

| Host organism                                  | CYP      | PDB ID | Sequence identity [%] |
|------------------------------------------------|----------|--------|-----------------------|
| <i>Bacillus megaterium</i> P450 <sub>BM3</sub> | CYP102A1 | 2IJ2   | 100                   |
| <i>Pseudomonas putida</i> P450 <sub>cam</sub>  | CYP101   | 3L62   | 17                    |
| <i>Streptomyces turgidiscabies</i> TxtE        | -        | 4L36   | 17                    |
| <i>Sulfolobus solfataricus</i>                 | CYP119   | 1IO7   | 21                    |
| <i>Mycobacterium sp.</i> HXN-1500              | CYP153A6 | -      | 16                    |

**Supplementary Figure 1.** Sequence alignment of P450 enzymes used in this study (ClustalW2.1). The highly conserved cysteine at the axial position is depicted in bold. The cysteine pocket is highlighted in gray.

|                     |                                                             | <b>Cys pocket</b> |     |
|---------------------|-------------------------------------------------------------|-------------------|-----|
| CYP119              | YVRVWIASANRDEEVF-HDGEKFI PDRN-----PNPHLSFGSGIHLCLGAPLARLEAR | LCLGAPLARLEAR     | 327 |
| CYP153A6            | KVVMWYVSGNRDPEAI-DNPDTF IIDRAK-----PRQHLSFGFGIHRVGNRLAELQLN | VGNRLAELQLN       | 374 |
| TxtE                | TLALFLGSANRDANMF-ERPNDFDLDRPN-----SARHLSFGQGVHACLAQLISLQLK  | HACLAQLISLQLK     | 367 |
| P450 <sub>cam</sub> | QILLPQMLSGLDEREN-ACPMHVDFSRQ-----KVSHTTFGHGSHLCLGQHLARREII  | LCLGQHLARREII     | 368 |
| P450 <sub>BM3</sub> | ELMVLIPQLHRDKTIWGDDVEEFRPERFENPSAIPQHAFKPFNGQRACIGQQFALHEAT | ACIGQQFALHEAT     | 411 |

**Supplementary Figure 2.** Electronic absorption spectra of ferric (blue), dithionite reduced ferrous (red) and carbon monoxide bound ferrous (green) of **A)** CYP153A6-C363S **B)** P450<sub>cam</sub>-C357S **C)** CYP119-C316S purified enzymes were normalized according to the hemochrome assay [4  $\mu$ M].

A) CYP153A6-C363S: Fe<sup>III</sup>, 405; Fe<sup>II</sup>, 416, 427; Fe<sup>II</sup>-CO, 413. Fe<sup>II</sup>-CO displays  $\alpha$  and  $\beta$  bands at 536 and 568 nm. The shoulder at 416 nm for the ferrous spectrum is due to incomplete reduction to Fe<sup>II</sup> under aerobic conditions.

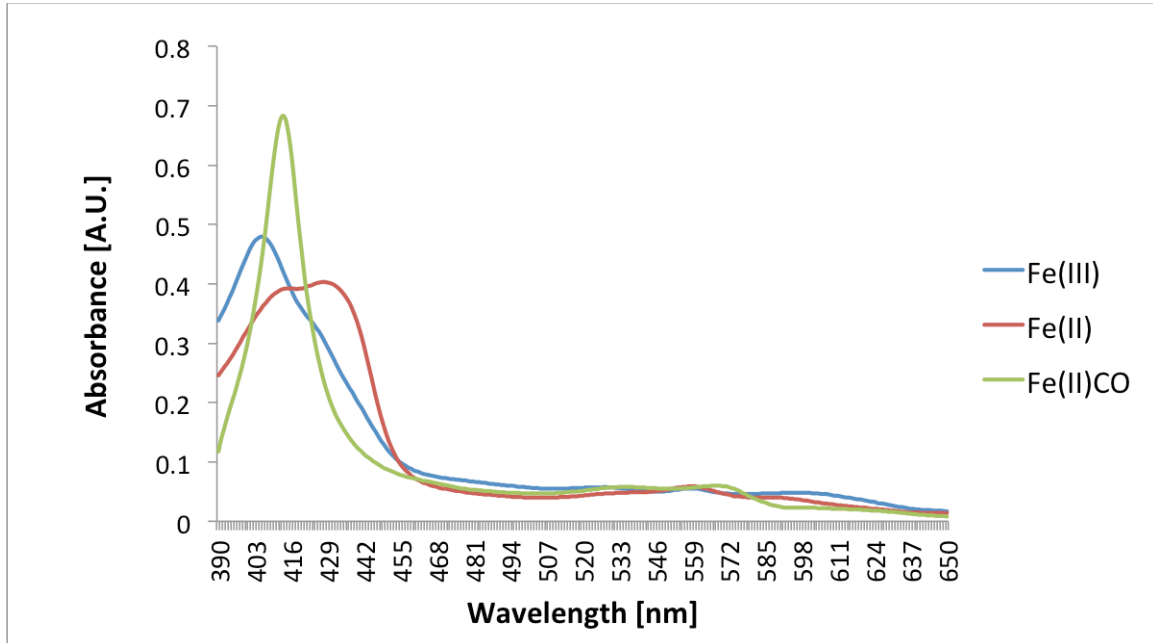

B) P450<sub>cam</sub>-C357S: Fe<sup>III</sup>, 423; Fe<sup>II</sup>, 427; Fe<sup>II</sup>-CO, 421. Fe<sup>II</sup>-CO displays  $\alpha$  and  $\beta$  bands at 538 and 568 nm.

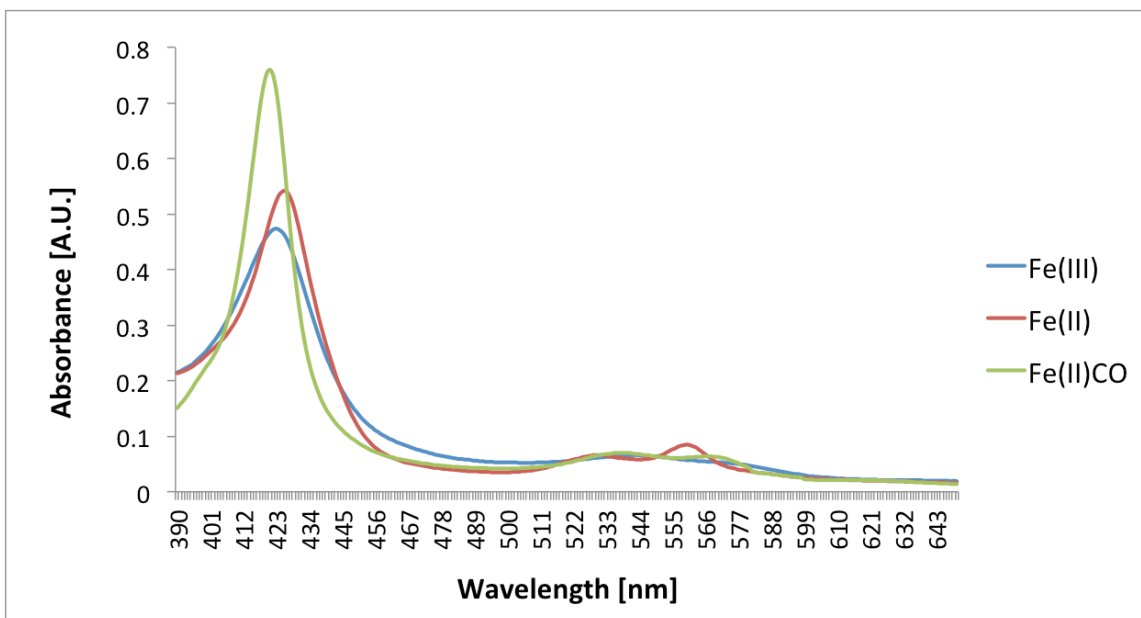

C) CYP119-C316S: Fe<sup>III</sup>, 404; Fe<sup>II</sup>, 422; Fe<sup>II</sup>-CO, 407. Fe<sup>II</sup>-CO displays  $\alpha$  and  $\beta$  bands at 530 and 563 nm.

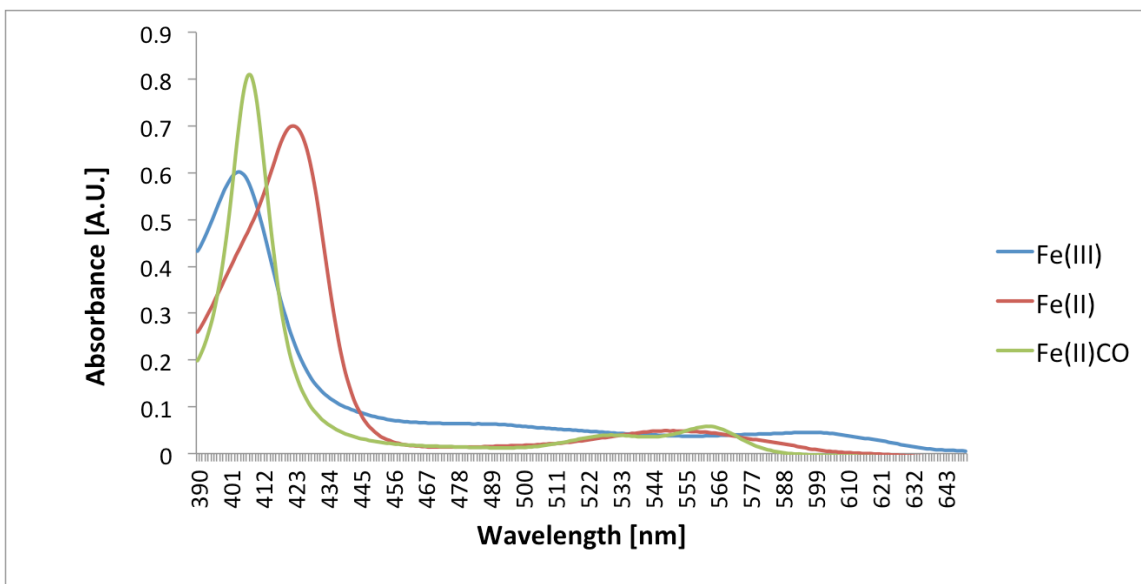

**Supplementary Figure 3 A)** Quantification of heme concentration of *E. coli* pET28 (empty plasmid) cell lysate used for whole cell cyclopropanation reactions. **(1)** without  $\delta$ -ALA addition during cultivation, **(2)** 250  $\mu$ M  $\delta$ -ALA added during cultivation and **(3)** 1000  $\mu$ M  $\delta$ -ALA added during cultivation. **B)** Cell pellets of *E. coli* pET28 (empty) cultivation: **(1)** without  $\delta$ -ALA addition, during cultivation, **(2)** with 250  $\mu$ M  $\delta$ -ALA addition, and **(3)** 1000  $\mu$ M  $\delta$ -ALA addition. Quantification represents duplicate measurements.

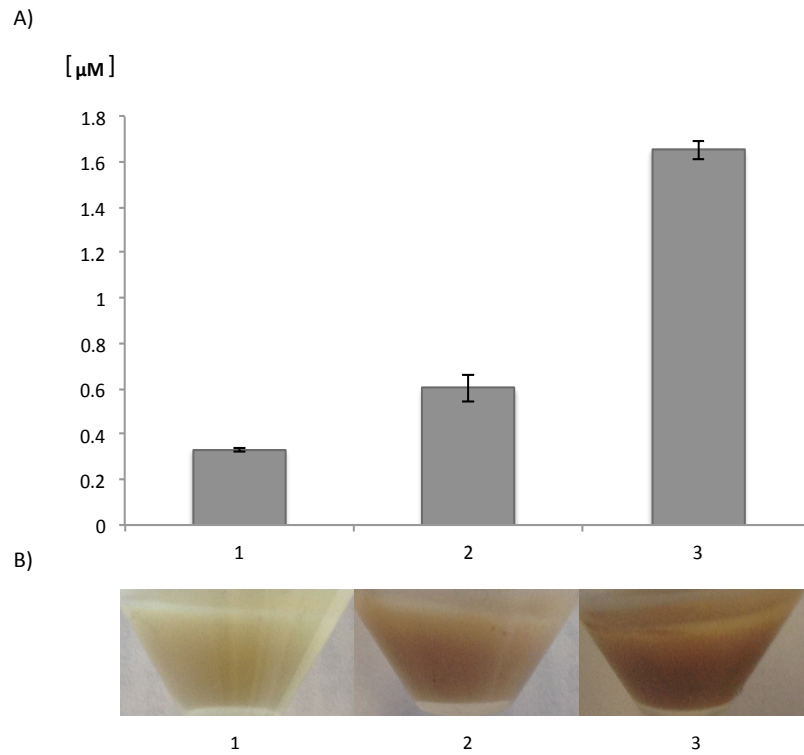

**Supplementary Table 2.** Whole cell catalysis of the reaction between styrene and EDA. M9-media was used as negative control. 5% EtOH co-solvent, 16 mM styrene, 8 mM EDA. The data represent triplicates with standard errors within the range of 20%. *rac* indicates enantioselectivity below 5% *ee*.

| Catalyst:                              | yield [%] | EDA  | cis/trans | cis <sub>ee</sub> [%] | trans <sub>ee</sub> [%] |
|----------------------------------------|-----------|------|-----------|-----------------------|-------------------------|
| M9-media                               | -         | 8 mM | -         | -                     | -                       |
| pET28-empty no $\delta$ -ALA           | 16        | 8 mM | 12:88     | <i>rac</i>            | -26                     |
| pET28-empty 250 $\mu$ M $\delta$ -ALA  | 28        | 8 mM | 14:86     | <i>rac</i>            | -11                     |
| pET28-empty 1000 $\mu$ M $\delta$ -ALA | 43        | 8 mM | 12:88     | <i>rac</i>            | -9                      |

**Supplementary Table 3.** Activities, reported in terms of yield and total turnover number, of purified wild-type and axial Cys to Ser mutants of P450 enzymes for cyclopropanation of styrene using EDA under aerobic conditions. The data represent the average of triplicates with standard errors within the range of 20%. - denotes product formation below 1% yield; *rac* indicates enantioselectivity below 5% *ee*. *n/a* : enzyme could not be purified.

| Catalyst:                    | yield [%]  | TTN        | cis/trans  | cis <sub>ee</sub> [%] | % trans <sub>ee</sub> [%] |
|------------------------------|------------|------------|------------|-----------------------|---------------------------|
| P450 <sub>BM3</sub> -h       | -          | -          | -          | -                     | -                         |
| P450 <sub>BM3</sub> -h-C400S | -          | -          | -          | -                     | -                         |
| CYP119                       | -          | -          | -          | -                     | -                         |
| CYP119-C316S                 | 7          | 71         | 87:13      | 38                    | 17                        |
| CYP153A6                     | -          | -          | -          | -                     | -                         |
| CYP153A6-C363S               | 12         | 117        | 10:90      | <i>rac</i>            | <i>rac</i>                |
| TxtE                         | 7          | 70         | 30:70      | 33                    | 11                        |
| TxtE-C356S                   | <i>n/a</i> | <i>n/a</i> | <i>n/a</i> | <i>n/a</i>            | <i>n/a</i>                |
| P450 <sub>cam</sub>          | 10         | 102        | 49:51      | -39                   | <i>rac</i>                |
| P450 <sub>cam</sub> -C357S   | 22         | 220        | 10:90      | -6                    | <i>rac</i>                |
| hemin                        | -          | -          | -          | -                     | -                         |
